# Supplementary material for: Assessing mycoplasma contamination of cell cultures by qPCR using a set of universal primer pairs targeting a 1.5 kb fragment of 16S rRNA genes
Source: PubMed Central journal article supplement (PMC5321415; doi:10.1371/journal.pone.0172358), 2017-02-22
Supplement: pone.0172358.s001.pdf [file pone.0172358.s001.pdf]

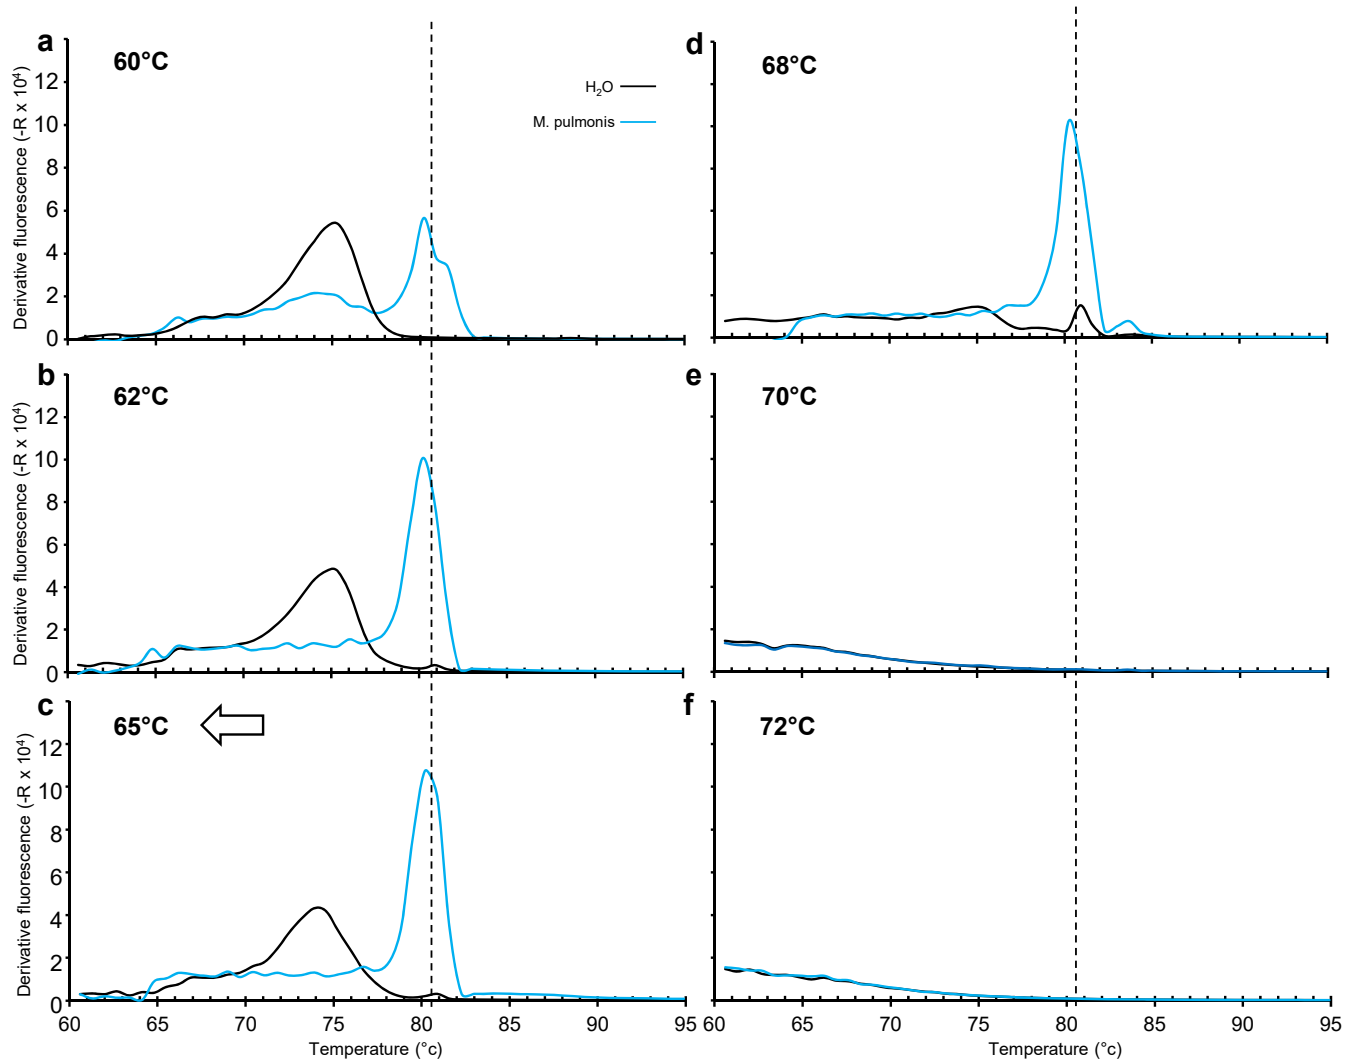

**Figure S1: Optimisation of elongation temperature during m16S qPCR of p\_m16S(0.9kb), *A. laidlawii* and *M. pulmonis* DNA. *T<sub>m</sub>* peak of 16S rDNA amplicon is indicated by the dotted line on each graph.**
