# Supplementary material for: Assessing mycoplasma contamination of cell cultures by qPCR using a set of universal primer pairs targeting a 1.5 kb fragment of 16S rRNA genes
Source: PubMed Central journal article supplement (PMC5321415; doi:10.1371/journal.pone.0172358), 2017-02-22
Supplement: pone.0172358.s002.pdf [file pone.0172358.s002.pdf]

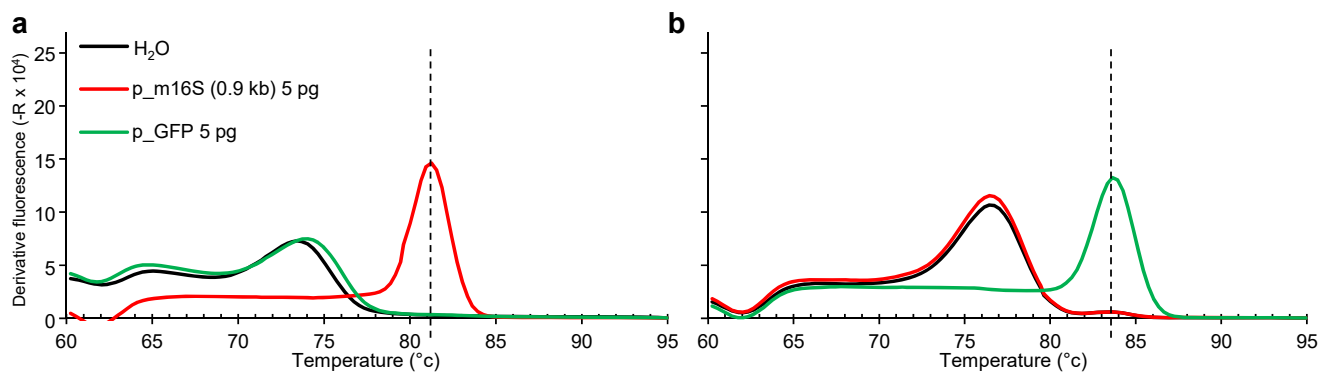

**Figure S2: Specificity of the m16S\_qPCR (a) and GFP\_qPCR (b) when tested on the p\_GFP DNA loading probe and p\_m16S(0.9kb) reference.**
