# Supplementary material for: Assessing mycoplasma contamination of cell cultures by qPCR using a set of universal primer pairs targeting a 1.5 kb fragment of 16S rRNA genes
Source: PubMed Central journal article supplement (PMC5321415; doi:10.1371/journal.pone.0172358), 2017-02-22
Supplement: pone.0172358.s003.pdf [file pone.0172358.s003.pdf]

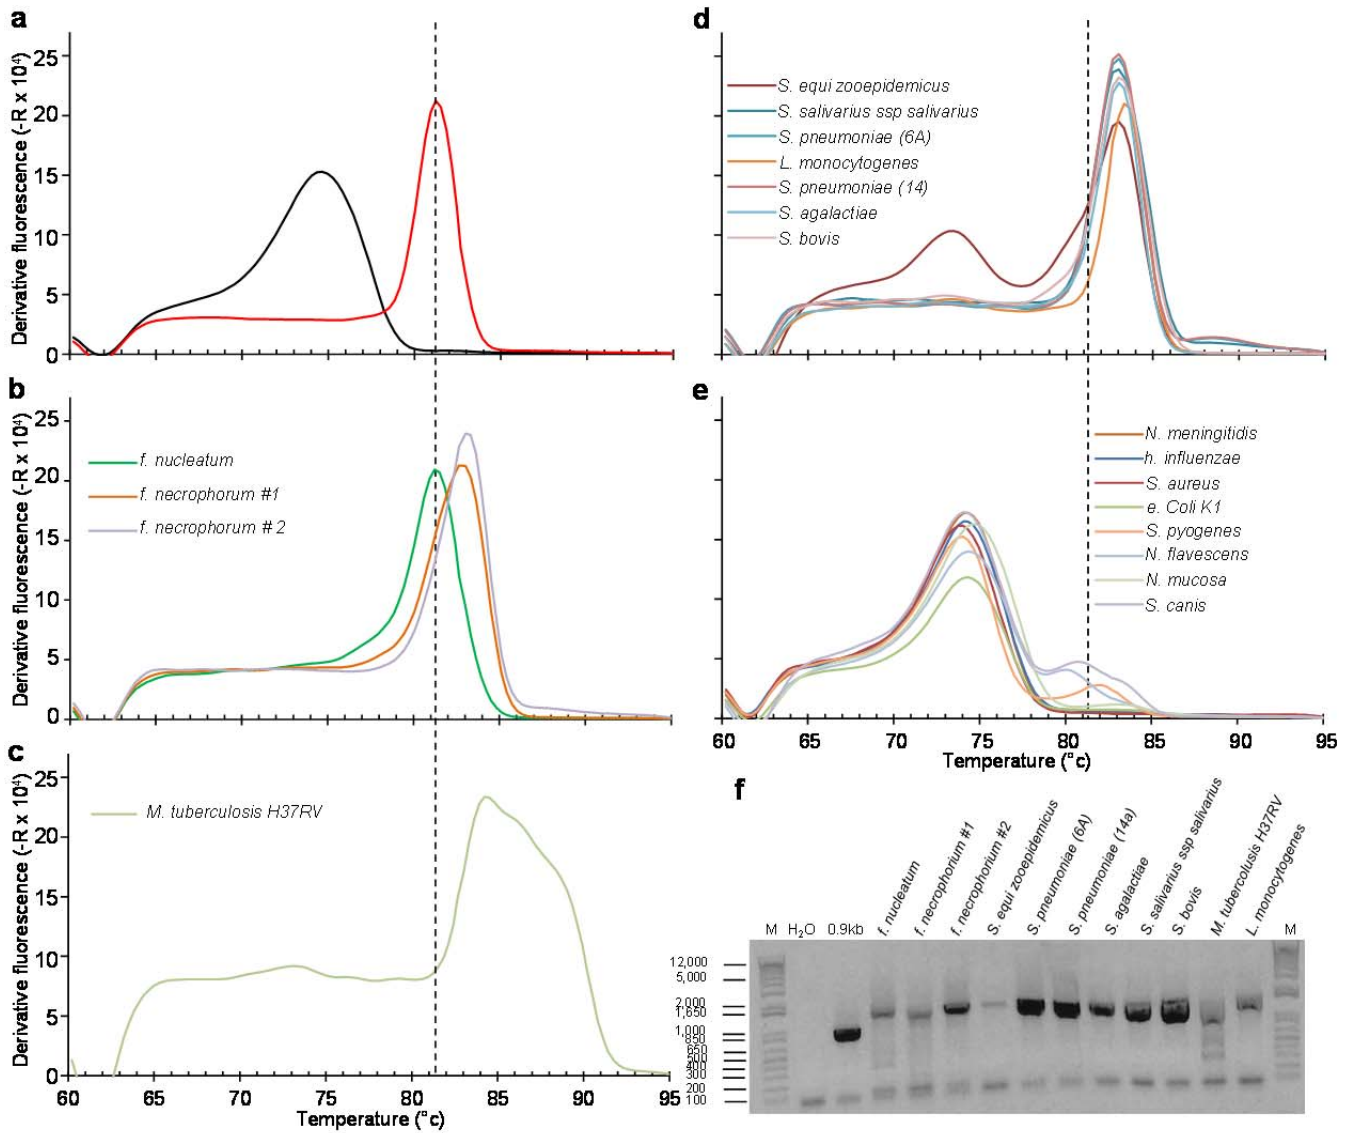

**Figure S3: m16S qPCR detects a subset of bacteria in addition to *Mollicutes* with p\_m16S(0.9kb) and water (a), detected (b-d) and non-detected (e) bacteria with amplicons sizes from panels a-d (f). *Tm* peak of 16S rDNA amplicon is indicated by the dotted line on each graph.**
